# Supplementary material for: Carbonate chemistry seasonality in a tropical mangrove lagoon in La Parguera, Puerto Rico
Source: PLoS One. 2021 May 5;16(5):e0250069. doi: 10.1371/journal.pone.0250069 (PMC8099052; doi:10.1371/journal.pone.0250069)
Supplement: S1 Table — (XLSX) [file pone.0250069.s002.xlsx]

## Sheet: Sheet1
BB	Temperature (°C)		Salinity (PSU)		DIC (µmol/kg)		TA (µmol/kg)		pH (total scale)		Ω Aragonite		pCO2 (µatm)		DIC/TA
Month	Mean	StdDev	Mean	StdDev	Mean	StdDev	Mean	StdDev	Mean	StdDev	Mean	StdDev	Mean	StdDev	Mean	StdDev
Jan	27.22	0.332566	36.552	1.05911	2110.8	25.6749	2349.8	11.649	7.87695	0.0586932	2.79324	0.309351	644.098	98.9409	0.898306	0.0116867
Feb	27.0417	0.42499	36.5183	0.736136	2087.83	18.6102	2340.4	29.5585	7.92052	0.0801282	2.99965	0.441645	572.663	111.757	0.888612	0.0167299
Mar	28.238	0.791499	36.948	0.30801	2098	74.0979	2336	29.129	7.8531	0.11468	2.78424	0.547999	699.582	221.488	0.89801	0.0253409
Apr	28.835	0.711808	37.21	0.648968	2084.75	80.2221	2306	17.3781	7.88449	0.0453603	2.91735	0.169119	611.025	83.5205	0.903964	0.0307439
May	29.7683	0.382697	37.2967	0.541984	2080.4	96.1057	2338.33	26.0128	7.85264	0.153233	2.97265	0.78361	719.603	326.677	0.890829	0.0358778
Jun	30.155	0.688016	38.0125	1.20779	2026	5.65685	2369.47	44.1767	7.93471	0.00978245	3.49362	0.100737	531.562	16.7183	0.868048	0.00557947
Jul	30.2883	0.71695	37.1467	0.588036	2056	24.2762	2354.67	32.1849	7.95397	0.0238034	3.61659	0.0625212	514.895	35.7864	0.866488	0.00323615
Aug	30.64	0.735289	36.162	1.26102	2103.6	72.8341	2351.8	44.9689	7.90442	0.0379338	3.298	0.13915	594.88	63.7656	0.894575	0.0305872
Sep	29.7867	0.436616	35.8	0.45299	2173.67	54.5191	2391.67	32.5935	7.8031	0.0410518	2.68022	0.22463	800.298	99.6072	0.908761	0.0111403
Oct	30.35	0.50324	35.558	0.983041	2157	28.6182	2380.5	17.3301	7.81894	0.0446475	2.77634	0.229569	767.694	92.8693	0.9058	0.0095752
Nov	29.327	0.251328	34.807	0.535851	2165	97.2757	2369.8	52.2664	7.79439	0.113116	2.56655	0.482134	845.392	284.128	0.913248	0.0227528
Dec	27.7786	0.835792	35.5314	0.831213	2170	67.0761	2422.33	42.084	7.87849	0.0762862	2.95113	0.354243	674.668	153.154	0.899164	0.0149859
Yearly mean	29.0302	1.36312	36.4656	1.13592	2113.59	73.1885	2359.46	42.5793	7.8694	0.0894599	2.95969	0.474832	673.914	187.67	0.895879	0.0236434
